# Supplementary material
Source: HighWire-hosted journal article supplement (http://www.cmajopen.ca/highwire/filestream/84938/field_highwire_adjunct_files/4/2020-0067-original-submission.pdf)
Supplement: 2020-0067-original-submission.pdf [file 2020-0067-original-submission.pdf]

1  
2  
3 **The impact of a single-entry intake system on access to outpatient specialist visits: A**  
4 **systematic review**  
5

6 Milica Milakovic, MSc<sup>1</sup>, Ann Marie Corrado, MSc<sup>2</sup>, Mina Tadrous, PhD PharmD<sup>3,4</sup>, Mary  
7 Elizabeth Nguyen<sup>5</sup>, Sandra Vuong, MSc<sup>6</sup> Noah Michael Ivers, MD, PhD, CCFP<sup>2,3,7</sup>

8  
9 <sup>1</sup> Faculty of Medicine, University of Toronto, Toronto, ON M5S 1A8, Canada.

10 <sup>2</sup> The Peter Gilgan Centre for Women’s Cancers, Women’s College Hospital, Toronto, ON M5S  
11 1B2, Canada.

12 <sup>3</sup> Women’s College Research Institute, Women’s College Hospital, Toronto, ON M5S 1B2,  
13 Canada.

14 <sup>4</sup> Leslie Dan Faculty of Pharmacy, University of Toronto, Toronto, ON M5S 3M2, Canada.

15 <sup>5</sup> Faculty of Medicine, Western University, London, ON N6A 5C1, Canada.

16 <sup>6</sup> Faculty of Medicine, University of Queensland, Brisbane, QLD 4072, Australia.

17 <sup>7</sup> Department of Family and Community Medicine and Institute of Health Policy, Management  
18 and Evaluation, University of Toronto, Toronto, ON M5S 1A1, Canada.  
19  
20

21  
22 **Conflicts of Interest:** None.  
23

24 **Acknowledgements:** AMC is supported by the Peter Gilgan Centre for Women’s Cancers at  
25 Women’s College Hospital, in partnership with the Canadian Cancer Society. NMI is supported  
26 as Canada Research Chair in Implementation of Evidence Based Practice and as a clinician  
27 scientist by the Department of Family and Community Medicine at the University of Toronto.  
28  
29  
30  
31  
32  
33  
34  
35  
36  
37  
38  
39  
40  
41  
42  
43  
44  
45  
46  
47  
48  
49  
50  
51  
52  
53  
54  
55  
56  
57  
58  
59  
60

## **Abstract**

**Background:** Wait times for specialist consultations is an area where Canada's health system lags behind other countries. Single-entry models (SEM), which combine patients in a shared queue to see the first available specialist, is one strategy used to reduce wait times. The aim of this systematic review is to assess the impact of a single-entry model (SEM) on waiting time, referral volume and patient/provider satisfaction.

**Methods:** A systematic search was conducted on MEDLINE, EMBASE, Cochrane CENTRAL and CINAHL from inception until December 2019. Studies from OECD countries were included if they reported on the effects of SEM on wait time one (WT1), the time between referral to the first specialist physician or allied health professional assessment. Secondary outcomes such as change in patient volume and satisfaction of providers and patients were reported. A narrative synthesis was conducted using descriptive statistics.

**Results:** Of the 4540 studies identified, 10 studies met the inclusion criteria. All included studies reported an absolute reduction in WT1 post-SEM implementation. The average percentage reduction in WT1 across specialties was highest in surgery (57%) and urgent internal medicine referrals (40%). Higher pre-implementation wait time was associated with greater benefit from the SEM. Patient and provider satisfaction with SEM was high in all studies. Effect estimates from all included studies were at a high risk of bias.

**Interpretation:** SEM is a promising option to decrease wait times and improve access to a range of health services, but there is a need for prospective, rigorous evaluations to inform policy.

**Trial registration:** PROSPERO ID: CRD42018100395

**Keywords:** Waiting Lists, Health Service Accessibility, Referral and Consultation

## Introduction:

Poor access and high specialist wait times is a pervasive problem facing many healthcare systems.<sup>1</sup> In comparison to its international peers, Canada struggles to provide timely access to care.<sup>2</sup> In a 2016 Commonwealth Fund survey, Canada performed the worst in wait times to specialist appointment; only 38% of Canadians waited <4 weeks to see a specialist, compared to 69.9% of Americans. In fact, Canadian wait times are twice as long than they were 25 years ago, currently averaging 19.8 weeks between referral and appointment in 2018 compared to 9.3 weeks in 1993.<sup>3</sup>

Currently, most outpatient clinicians use a “multiple-queue, multiple server” model to manage their referrals and wait lists, whereby each clinician has their own separate queue.<sup>4</sup> As such, clinicians of the same specialty and region may have varying referral and wait lists, potentially leading to inequitable and suboptimal patient outcomes. In contrast, “single-entry models” (SEM) assemble patients referred to specific specialists in a given jurisdiction into a single queue, thereby facilitating patients to see the first available specialist. SEM consists of a centralized intake (i.e. referrals are received through a single point of entry) or a pooled referral system (i.e. merging of multiple waiting lists), along with a centralized coordinated approach to triage (i.e. appointments arranged based on urgency).<sup>6</sup>

SEM is based on queuing theory<sup>5</sup>, and has been proven successful in operational fields such as the airline industry.<sup>6</sup> The benefits of SEMs in healthcare are thought to occur due to rebalancing of supply (i.e. clinician availability) and demand (i.e. the number of referrals).<sup>4</sup> In addition, sicker patients may be seen faster with a central intake system, whereby the patient is referred to an available provider based on urgency. Though SEMs may prevent duplicate appointments and cancelled appointments, they may also limit choice and reduce satisfaction.<sup>4</sup>

A prior review has suggested that SEMs may reduce wait times for surgeries.<sup>6</sup> In this systematic review, we evaluate the impact of SEM implementation on the wait time from initial referral to physician or allied health specialist appointment, as well as on referral volume and patient/provider satisfaction.

## Methods:

### Search

A systematic literature search was conducted on MEDLINE, EMBASE, Cochrane CENTRAL and CINAHL from inception to December 2019. All keywords were searched and mapped onto subject headings where appropriate. References of included articles were also screened for inclusion. The search was extended from Damani et al. (2017) to include medical and allied health appointments.<sup>6</sup> The full search strategy is listed in Appendix A. PRISMA guidelines were followed for study design and reporting, and this review was registered on PROSPERO (CRD42018100395). Given the study design, ethics approval was not required.

### Study Selection

Three reviewers (M.M., M.E.N., S.V.) conducted title and abstract screening followed by full-text review. Discrepancies were resolved through consensus or by consulting a fourth author (N.M.I.). Original studies were included if they met all of the following inclusion criteria: (a) inclusion of outpatients who were referred to specialists for medical, surgical or allied health services, (b) articles that implemented SEM, (c) studies which measured the wait time from referral to the specialist appointment (WT1), both for pre-SEM implementation and post-implementation timepoints. Studies that only reported an absolute reduction of WT1 pre- to post-implementation were also included. To facilitate generalizability with the Canadian healthcare system, studies were excluded if they were not conducted in OECD countries.<sup>20</sup>

### Data Collection

All data collection was completed on Microsoft Excel ® (Redmond, Washington). Two independent reviewers (M.M., A.M.C) collected the following demographics: first author, year of publication, country of implementation, speciality setting, healthcare setting (i.e. private vs. public), insurance mandate (i.e. single-payer vs. multi-tier), study design, type of single-entry model, sample size, implementation process, implementation fidelity (i.e. how studies ensured uptake and ongoing use of the new approach; the “degree of adherence to the described implementation strategy”<sup>8</sup>), and whether studies reported on optional or mandatory implementation. Collected outcome data included pre-implementation and post-implementation WT1, change in patient volume as well as pre-implementation and post-implementation patient

1  
2  
3 and provider satisfaction. When certain study data was not available, authors were contacted for  
4 clarification. Corresponding authors of individual studies were contacted via e-mail in the case of  
5 missing information. However, sample size for three papers were not included despite contacting  
6 authors.<sup>10,11,15</sup> Any discrepancies were resolved through consensus.  
7  
8  
9

### 10 11 12 Risk of Bias

13 The Risk of Bias in Non-randomized Studies – of Interventions (ROBINS-I) tool was used to  
14 assess quality and risk of bias of the included studies. The ROBINS-I tool is designed to assess  
15 the risk of bias in non-randomized studies that compare the effects of two or more interventions.<sup>9</sup>  
16 We assessed the risk of bias using all seven domains in the ROBINS-I tool, reported in Table 2.  
17 For each domain, risk of bias assessment was conducted according to the following scale: low,  
18 moderate, serious, critical or no information. This was completed by two reviewers (M.M.,  
19 A.M.C).  
20  
21  
22  
23  
24  
25  
26

### 27 Data Analysis

28 For all outcomes, data was reported using means, frequency and proportions as needed. Study  
29 characteristics and outcome data such as wait time and patient and physician satisfaction were  
30 reported. For data extracted from figures, the pre-implementation values were extracted from the  
31 figure at last follow-up, which was compared to post-implementation data at last follow-up. The  
32 relationship between baseline WT1 and the absolute reduction in WT1 was investigated using  
33 the coefficient of determination based on a linear relationship. P-values were included if  
34 reported, with a p-value less than 0.05 considered statistically significant. Microsoft Excel ® was  
35 used to compile and analyze all collected data.  
36  
37  
38  
39  
40  
41  
42  
43

### 44 Results:

45 From a literature search of 4,527 unique studies, title and abstract screening excluded 4,510  
46 studies (Figure 1). Of the 17 remaining articles, a total of 10 articles met inclusion criteria and  
47 were included in the systematic review.<sup>5,10-18</sup>  
48  
49  
50  
51  
52

### 53 Study Characteristics

Table 1 summarizes the characteristics of the included studies. Eight studies were from Canada<sup>5,10,11,13-14,16-18</sup>, one from Australia<sup>12</sup> and one from England.<sup>15</sup> The studies were published from 2004-2017, with the majority published after 2010.<sup>5,11-13,17-18</sup> Overall, nine articles utilized a simple pre- compared to post-implementation study design<sup>5,10-12,13-17</sup> and one was cross-sectional.<sup>18</sup> Three studies evaluated the use of SEM in surgery (orthopedics and general surgery),<sup>10,15,18</sup> five in internal medicine (gastroenterology, rheumatology, cardiology, general internal medicine and nephrology),<sup>5,12,14,16,17</sup> one in chronic pain<sup>11</sup> and one in physiotherapy.<sup>13</sup> All studies were conducted in a single-payer health care system<sup>5,10-11,13-18</sup>, except one which was performed in a two-tier system.<sup>12</sup> Three studies required mandatory SEM implementation<sup>12,13,16</sup> while seven reported on optional SEM implementation.<sup>5,10,11,14,15,17,18</sup> The implementation process for SEM was described in all studies. However, implementation fidelity was only described in three articles.<sup>5,10,13</sup> Nine studies used quantitative analysis<sup>5,10-12,14-18</sup> and one study used a mixed-methods approach.<sup>13</sup>

#### Risk of Bias:

Effect estimates from all included studies were at a high risk of bias (Table 2). Eight of the included studies had a serious risk of bias<sup>5,11-17</sup> and two studies had a critical risk of bias<sup>10,18</sup>. There was serious or critical risk of bias in the following categories: bias due to confounding (n=10), bias in selection of participants into the study (n=1) and bias due to missing data (n=1). Three categories generally had low risk of bias: bias in classification of intervention (n=10), bias in measurement of outcome (n=9) and bias in selection of the reported results (n=8).

#### SEM Implementation: Effects on Wait Time and Volume

Table 3 summarizes main outcomes of the included studies. All included studies reported a reduction in WT1 (Figure 2).<sup>5,10-18</sup> Statistically significant reduction in WT1 was reported in six studies.<sup>5,12-14,16-17</sup> The pre- to post-implementation improvement in WT1 was highest in the Clark et al. study at 274 days and lowest for Wittmeier et al. at 5.5 days.<sup>11,13</sup> When categorized by speciality, the average absolute reduction was highest in surgery, at 150 days on average, and lowest for urgent referrals to internal medicine at 12 days (Figure 3). However, the average percentage reduction in WT1 across specialties was highest in both surgery (57% relative reduction) and urgent referrals to internal medicine (40% relative reduction). Moderate and

1  
2  
3 routine referrals to internal medicine were associated with a lower percentage reduction in WT1  
4 (36% and 17% relative reduction, respectively; Figure 4).  
5  
6  
7

8 Pre-implementation wait times was associated with absolute reduction in WT1 ( $R^2=0.5978$ )  
9 (Figure 5). For every 1 day increase in the pre-implementation wait time, it is expected that the  
10 absolute reduction in WT1 will increase by 0.5 days (Figure 5).  
11  
12  
13

14  
15 Of the three studies reporting on mandatory implementation of SEM, the range of WT1  
16 improvement was five to 47 days.<sup>12,,13,16</sup> The other seven studies that allowed for optional  
17 involvement had a range of improvement in WT1 of six days to nine months.<sup>5,10,11,14,15,17,18</sup>  
18  
19  
20

21  
22 Patient volume was measured in four studies with variable results.<sup>13,14,16,17</sup> One study found no  
23 change in referral volume for rheumatology and hematology practices, but did find an increased  
24 referral volume for endocrinology, gastroenterology and general internal medicine practices  
25 post-SEM implementation.<sup>16</sup> In a cardiology study, patient volume increased by 50% in the first  
26 year after SEM implementation and another 19% in the second.<sup>14</sup> In Schacter et al., there was a  
27 22% reduction in referral volume in nephrology.<sup>17</sup> Lastly, Wittmeier et al found that the referral  
28 volume stayed the same after implementation of SEM in a group of children with  
29 neurodevelopmental conditions, but that referral volume increased for pediatric orthopedic  
30 clinics.<sup>13</sup>  
31  
32  
33  
34  
35  
36  
37  
38

### 39 Patient and Physician Satisfaction:

40  
41 Appendix 1 summarizes patient and physician satisfaction in the included studies. Three studies  
42 described patient satisfaction after implementation of an SEM,<sup>10,13,18</sup> with only one study  
43 providing data for pre- and post-implementation.<sup>13</sup> All studies reported positive patient  
44 satisfaction or improvement in satisfaction with SEM models. Van den Heuvel et al. found that  
45 patients who had the same surgeon for assessment and surgery (group 1) rated importance of  
46 same surgeon higher (98.4%) than the group that did not have the same surgeon for surgery and  
47 assessment (48.3%).<sup>18</sup> Regardless of whether patients had the same surgeon assess and perform  
48 the surgery, confidence remained high in both groups (group 1: 100%, group 2: 86.2%  
49 (p=0.009). As well, both groups felt that service was faster and better with a common waiting  
50  
51  
52  
53  
54  
55  
56  
57  
58  
59  
60

1  
2  
3 list.<sup>18</sup> Wittmeier et al. found that patient satisfaction was high both pre- and post-implementation  
4 of a central intake system (96.5% and 98%, respectively).<sup>13</sup> As well, caregivers reported that  
5 implementation of SEM provided more transparency for accessing services, more accurate  
6 information on wait times, more availability, improved communication and a reduction in service  
7 duplication.<sup>13</sup>  
8  
9  
10  
11  
12

13 One study provided data on provider satisfaction post-implementation.<sup>5</sup> Providers deemed  
14 referrals as higher quality (pre: 1/3 of rheumatologists rated referrals as poor quality, post: 19%  
15 of referrals were rated as poor quality), and more complete (pre: 75% were not satisfied with  
16 completeness of referral, post: 68% rated completeness of referral as moderate and 19% as high)  
17 after implementation of a central intake model.<sup>13</sup>  
18  
19  
20  
21  
22  
23

#### 24 Interpretation:

25 This systematic review indicates that implementation of a SEM generally leads to decreased wait  
26 times to first specialist outpatient visit. The average percent reduction in WT1 improved  
27 significantly for surgery, urgent referrals, and for children with complex needs, suggesting that a  
28 centralized intake system may be more helpful for higher priority referrals. When examining the  
29 relationship between the pre-implementation wait time and the reduction in wait time pre- to  
30 post-implementation, there was a significant relationship when analyzed via absolute terms. As  
31 such, on absolute terms, patients waiting longer at baseline could expect to see significant  
32 reductions in their wait times following introduction of SEM.  
33  
34  
35  
36  
37  
38  
39  
40

41 In 2017, a systematic review published by Damani et al. showed that SEMs improve access to  
42 elective surgical procedures.<sup>6</sup> For surgical services, they identified that SEMs result in a decrease  
43 in patient waiting times, increased proportion of patients meeting wait time benchmarks and a  
44 decrease in the length of waiting lists.<sup>6</sup> In comparison, our review supports the implementation  
45 and evaluation of SEMs beyond surgical care and adds further information on approaches to  
46 implementation, referral volumes, and satisfaction.  
47  
48  
49  
50  
51  
52

53 The range in effects observed for referral volume could be due to differences in the complexity  
54 of referrals, the nature of the field, local referral patterns, education on appropriate referrals and  
55  
56  
57  
58  
59  
60



1  
2  
3 the referring physicians' comfortability and satisfaction with the new model.<sup>13,14,16,17</sup> When  
4 reported, patient and provider satisfaction improved following implementation of SEM.<sup>5,10,13,18</sup>  
5 One study reported that the quality of referrals improved post-implementation, however it is not  
6 clear if this is due to a standardized referral form that was given to referring physicians post-  
7 implementation or due to the SEM.<sup>5</sup> In comparison, the review by Damani et al. found that  
8 SEMs may leave specialists and referring physicians feeling a sense of reduced personal  
9 ownership over the referral system.<sup>6</sup>  
10  
11  
12  
13  
14  
15  
16

17 Another model, termed the specific timely appointment for triage (STAT) model, has been  
18 proposed and investigated for reducing wait times to appointments.<sup>19</sup> This model is based on  
19 assumptions of referral volume of a practice. STAT slots are protected in clinicians' schedules,  
20 which are informed based on patient demand. Each physician creates a certain number of STAT  
21 time slots depending on anticipated referral demand. As a result, new patients are booked into  
22 STAT slots and are potentially seen faster.<sup>19</sup> Another complementary option that makes  
23 specialist knowledge and advice more accessible to primary care is e-consultations.<sup>20,21</sup>  
24  
25  
26  
27  
28  
29  
30

31 The limitations of available data identified through this review deserve consideration. Only three  
32 studies reported on patient satisfaction and one on provider satisfaction. Sustainability of SEMs  
33 was not adequately assessed in all studies. Unsustainable models can lead to poor quality of care,  
34 financial consequences and worse patient outcomes.<sup>22</sup> Communication among stakeholders and  
35 engagement between those involved at all levels of the organization were cited as key factors for  
36 developing a sustainable system.<sup>10,16</sup> In particular, Wittmeier et al. found that gathering and  
37 facilitating communication amongst stakeholder's facilitated change and implementation of a  
38 central intake system.<sup>13</sup> Furthermore, few studies reported on implementation fidelity and when  
39 they did, efforts to ensure fidelity (or adaptation) were not adequately described.<sup>5,10,18</sup> Likewise,  
40 the only indication of cost-effectiveness in our review is from the study by Leach et al., who  
41 mentioned that their SEM system was cost-neutral.<sup>15</sup>  
42  
43  
44  
45  
46  
47  
48  
49  
50

51 Our review identified serious or critical risk of bias across included studies. Specifically, there  
52 was high risk of confounding across all studies. Eight articles utilized a simple pre- compared to  
53 post-implementation study design which did not allow us to conclude that the differences from  
54  
55  
56  
57  
58  
59  
60

1  
2  
3 pre-implementation to post-implementation were due to any other variable other than the  
4 implementation of SEM. Sample sizes for three papers were not included. As such, weighted  
5 averages were unable to be calculated because either sample sizes were unknown or sample sizes  
6 for specific categories (urgent, routine, moderate referrals) were not specified. Given  
7 heterogeneity in study design, outcome measurements, and populations, meta-analysis was not  
8 conducted. Finally, we cannot exclude the likelihood of publication bias.  
9  
10  
11  
12  
13  
14

15 **Conclusion:**

16 While this review has shown that SEM has the potential to decrease WT1, there remains  
17 uncertainty regarding the efficacy, cost-effectiveness, and sustainability of SEM. It remains  
18 uncertain if SEM can be applied to all specialty-types and across diverse settings (e.g. rural  
19 environments, marginalized populations and developing nations). Lastly, it is unknown whether  
20 improvements in WT1 through the implementation of a SEM significantly impacts health  
21 outcomes. Studies that evaluate SEM should feature methodological or statistical methods to  
22 control bias.  
23  
24  
25  
26  
27  
28  
29  
30  
31  
32  
33  
34  
35  
36  
37  
38  
39  
40  
41  
42  
43  
44  
45  
46  
47  
48  
49  
50  
51  
52  
53  
54  
55  
56  
57  
58  
59  
60

## References

- 1) Siciliani L, Borowitz M, & Moran V. Waiting time policies in the health sector. OECD Health Policy Studies 2013 [cited 2019 Jun]; Available from: [https://www.oecd-ilibrary.org/social-issues-migration-health/waiting-times-for-elective-surgery-what-works\\_9789264179080-en](https://www.oecd-ilibrary.org/social-issues-migration-health/waiting-times-for-elective-surgery-what-works_9789264179080-en)
- 2) Barua B. When compared to similar countries, Canada's health-care wait times are the worst [Internet]. Fraser Institute 2018 [cited 2019 Jul]. Available from: <https://www.fraserinstitute.org/article/when-compared-to-similar-countries-canadas-health-care-wait-times-are-the-worst>
- 3) Barua B, Jacques D. Waiting your turn: Wait times for health care in Canada, 2018 report. Fraser Institute 2019 [cited 2019 Jul]. Available from: <https://www.fraserinstitute.org/sites/default/files/waiting-your-turn-2018.pdf>
- 4) Novak K, Veldhuyzen Van Zanten S, Pendharkar SR. Improving access in gastroenterology: the single point of entry model for referrals. *Can J Gastroenterol.* 2013;27(11):633-5.
- 5) Hazlewood GS, Barr SG, Lopatina E, Marshall DA, Lupton TL, Fritzler MJ, et al. Improving Appropriate Access to Care With Central Referral and Triage in Rheumatology. *Arthritis Care Res (Hoboken).* 2016;68(10):1547-53.
- 6) Damani Z, Conner-Spady B, Nash T, Tom Stelfox H, Noseworthy TW, Marshall DA. What is the influence of single-entry models on access to elective surgical procedures? A systematic review. *BMJ Open.* 2017;7(2):e012225.
- 7) List of Countries [Internet]. OECD. [cited 2020Apr2]. Available from: <https://www.oecd.org/about/members-and-partners/>
- 8) Pinnock H, Sheikh A. Standards for reporting implementation studies (StaRI): enhancing reporting to improve care. *NPJ Prim Care Respir Med.* 2017;27(1):42.
- 9) Sterne JA, Hernan MA, Reeves BC, Savovic J, Berkman ND, Viswanathan M, et al. ROBINS-I: a tool for assessing risk of bias in non-randomised studies of interventions. *BMJ.* 2016;355:i4919.
- 10) MacLeod A, Gollish J, Kennedy D, McGlasson R, Waddell J. Toward a joint health and disease management program: Toronto hospitals partner to provide system leadership. *Healthc Q.* 2009;12(2):56-65.
- 11) Clark AJ. Central triage and improving the consultation process for patients with chronic pain. *Pain Res Manag. Conference: 36<sup>th</sup> Annual Scientific Meeting of the Canadian Pain Society; 2015; Charlottetown, PE Canada.*

- 12) Goodsall T M, Haskins R, Bennetts K, Bollipo S. A single-entry model for clinical triaging reduces wait time and improves key performance indicators of service delivery. *J Gastroenterol Hepatol.* 2017; 32(S2):161-162.
- 13) Wittmeier KD, Restall G, Mulder K, Dufault B, Paterson M, Thiessen M, et al. Central intake to improve access to physiotherapy for children with complex needs: a mixed methods case report. *BMC Health Serv Res.* 2016;16:455.
- 14) Bungard TJ, Smigorowsky MJ, Lalonde LD, Hogan T, Doliszny KM, Gebreyesus G, et al. Cardiac EASE (Ensuring Access and Speedy Evaluation) - the impact of a single-point-of-entry multidisciplinary outpatient cardiology consultation program on wait times in Canada. *Can J Cardiol.* 2009;25(12):697-702.
- 15) Leach P, Rutherford SA, King AT, Leggate JR. Generic waiting lists for routine spinal surgery. *J R Soc Med.* 2004;97(3):119-20.
- 16) Bichel A, Erfle S, Wiebe V, Axelrod D, Conly J. Improving patient access to medical services: preventing the patient from being lost in translation. *Healthc Q.* 2009;13 Spec No:61-8.
- 17) Schachter ME, Romann A, Djurdev O, Levin A, Beaulieu M. The British Columbia Nephrologists' Access Study (BCNAS) - a prospective, health services interventional study to develop waiting time benchmarks and reduce wait times for out-patient nephrology consultations. *BMC Nephrol.* 2013;14:182.
- 18) van den Heuvel B, Vair B, Porter G, Klassen D, Inglis K, Bonjer HJ. Patient compliance with a group model of care: the hernia clinic. *Can J Surg.* 2012;55(4):259-63.
- 19) Harding KE, Leggat SG, Bowers B, Stafford M, Taylor NF. Reducing waiting time for community rehabilitation services: a controlled before-and-after trial. *Arch Phys Med Rehabil.* 2013; 94(1):23-31.
- 20) Liddy C, Drosinis P, Keely E. Electronic consultation systems: worldwide prevalence and their impact on patient care-a systematic review. *Fam Pract.* 2016;33(3):274-85.
- 21) Vimalananda V, Orlander JD, Afable MK, Fincke BG, Solch AK, Rinne ST et al. Electronic consultations (E-consults) and their outcomes: a systematic review. *J Am Med Inform Assoc.* 2019;27(3):471-479.
- 22) Wiltsey Stirman S, Kimberly J, Cook N, Calloway A, Castro F, Charns M. The sustainability of new programs and innovations: a review of the empirical literature and recommendations for future research. *Implement Sci.* 2012;7:17

1  
2  
3  
4  
5  
6  
7  
8  
9  
10  
11  
12  
13  
14  
15  
16  
17  
18  
19  
20  
21  
22  
23  
24  
25  
26  
27  
28  
29  
30  
31  
32  
33  
34  
35  
36  
37  
38  
39  
40  
41  
42  
43  
44  
45  
46  
47  
48  
49  
50  
51  
52  
53  
54  
55  
56  
57  
58  
59  
60

**Figure 1: PRISMA Flow Diagram**

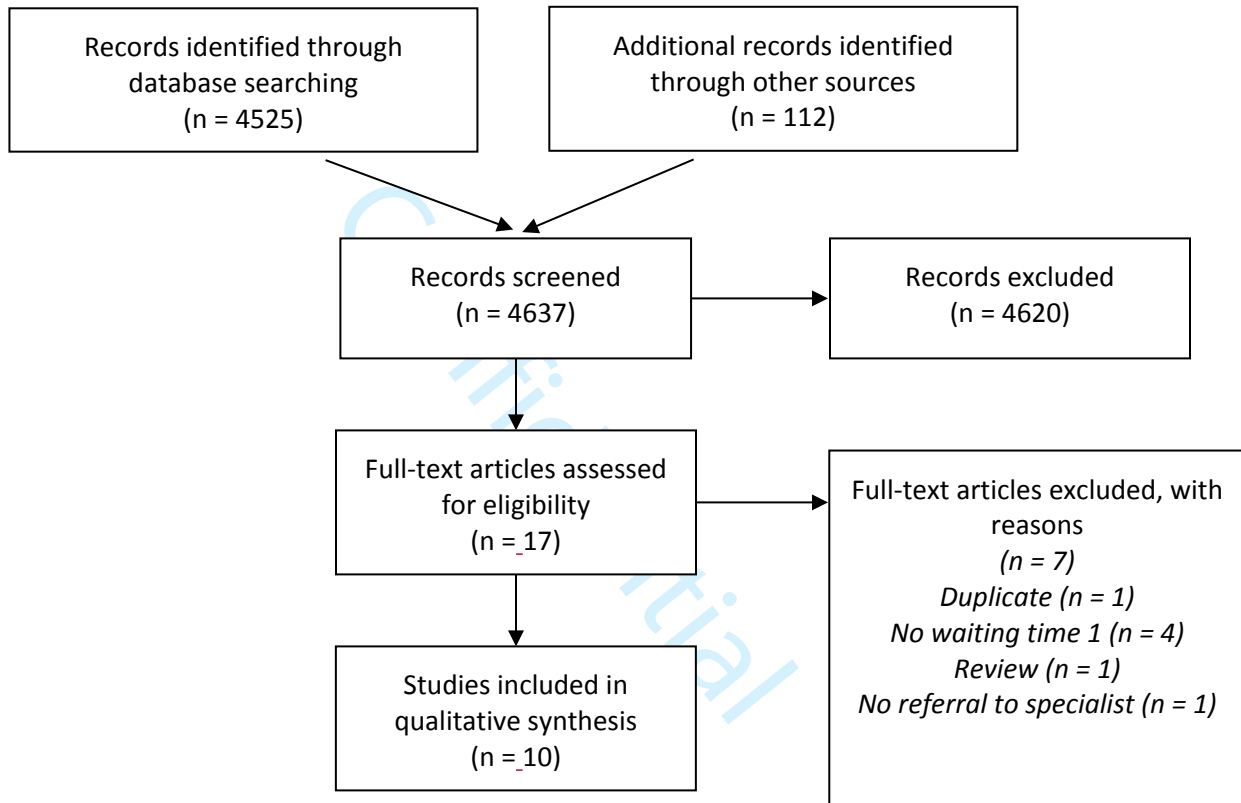

**Figure 2. Absolute Reduction of Wait Times Across Included Studies**

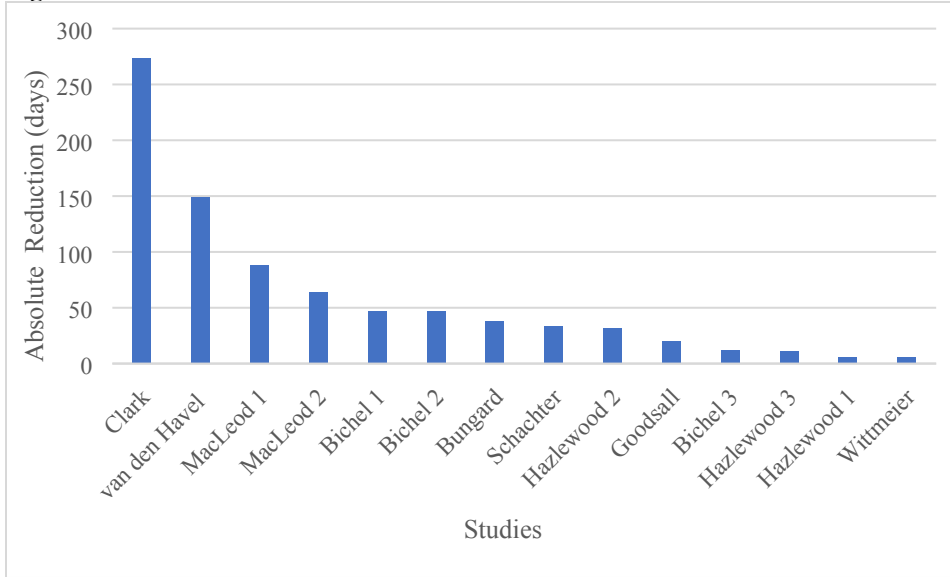

\*Total number of studies:9

\*Figure does not include Leach et al.<sup>15</sup>

\*MacLeod 1: knee surgery; MacLeod 2: hip surgery<sup>10</sup>

\*Hazlewood 1: routine referrals; Hazlewood 2: moderate referrals; Hazlewood 3: urgent referrals<sup>5</sup>

\*Bichel 1: routine referrals; Bichel 2: moderate referrals; Bichel 3: urgent referral<sup>16</sup>

Confidential

1  
2  
3  
4  
5  
6  
7  
8  
9  
10  
11  
12  
13  
14  
15  
16  
17  
18  
19  
20  
21  
22  
23  
24  
25  
26  
27  
28  
29  
30  
31  
32  
33  
34  
35  
36  
37  
38  
39  
40  
41  
42  
43  
44  
45  
46  
47  
48  
49  
50  
51  
52  
53  
54  
55  
56  
57  
58  
59  
60

**Figure 3. Average of Absolute Reduction of Wait Time Across Specialties**

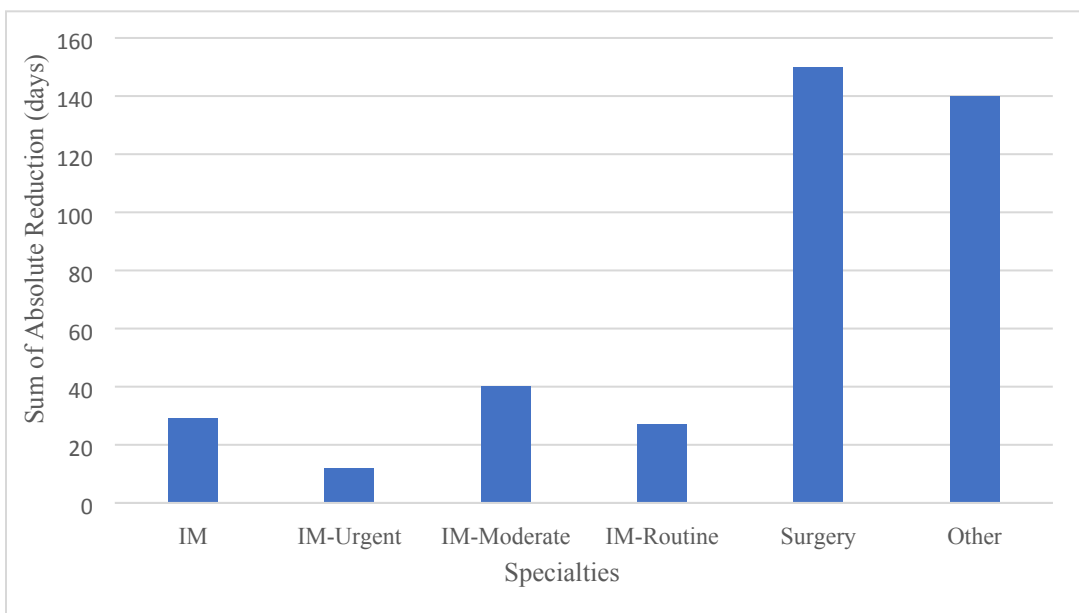

\*Total number of studies:9.  
 \*IM= Internal Medicine  
 \*Figure does not include Leach et al.<sup>15</sup>  
 \*Other: chronic pain and physiotherapy<sup>11,13</sup>

Confidential

**Figure 4. Average of Percent Reduction in Wait Time Across Specialties**

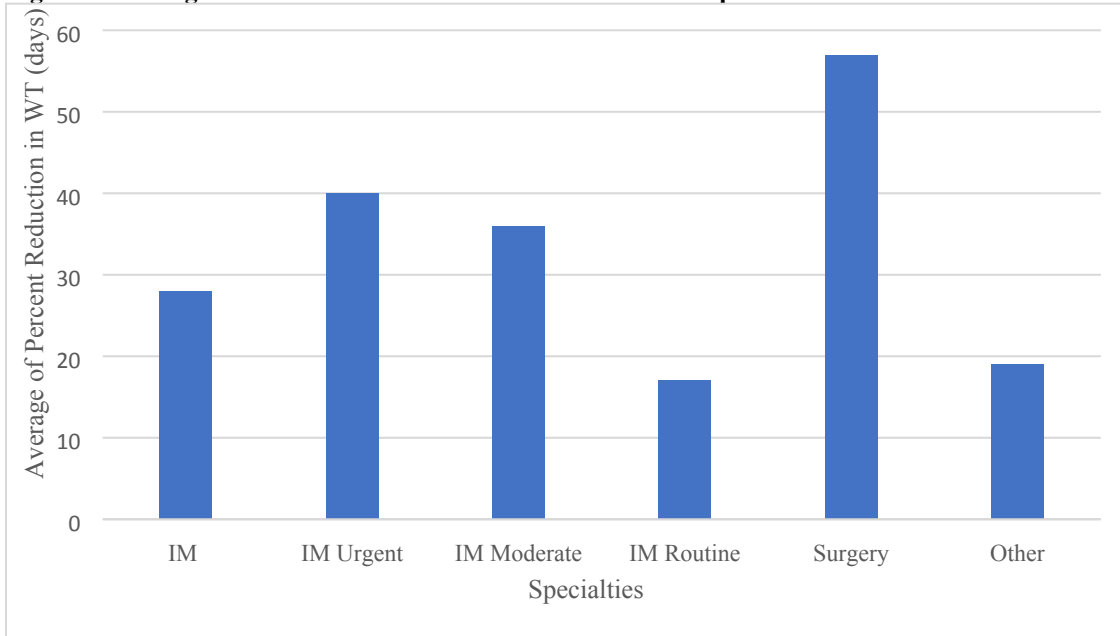

\*Total number of studies:8

\*IM= Internal Medicine

\*Figure does not include Leach et al.<sup>15</sup>

\*Figure does not include Clark (could not calculate percent reduction in WT1)<sup>11</sup>

Confidential



1  
2  
3  
4  
5  
6  
7  
8  
9  
10  
11  
12  
13  
14  
15  
16  
17  
18  
19  
20  
21  
22  
23  
24  
25  
26  
27  
28  
29  
30  
31  
32  
33  
34  
35  
36  
37  
38  
39  
40  
41  
42  
43  
44  
45  
46  
47  
48  
49  
50  
51  
52  
53  
54  
55  
56  
57  
58  
59  
60

**Figure 5. Relationship Between Pre-Implementation Wait Time and Absolute Reduction in Wait Time**

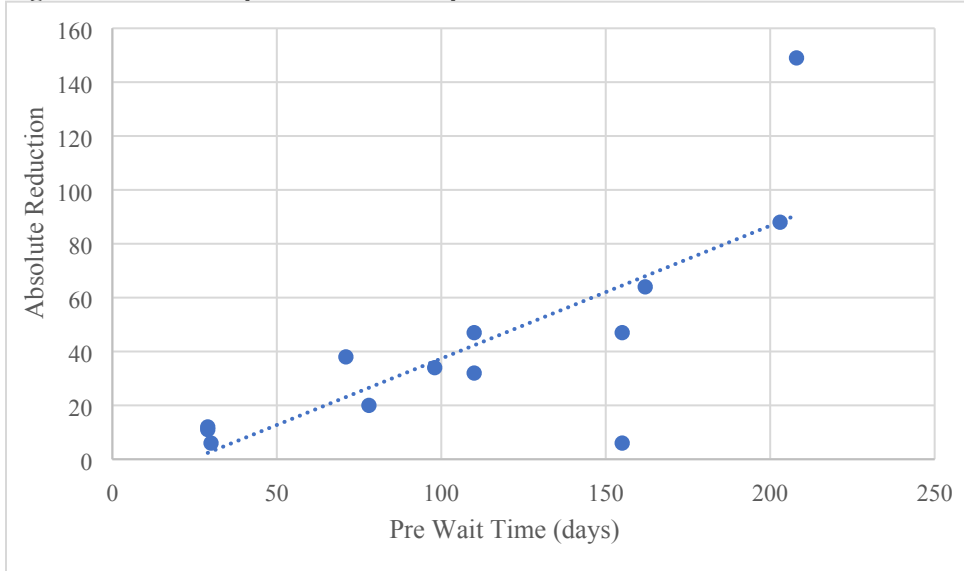

\*Total number of studies:8  
\*Figure does not include Leach et al<sup>15</sup>  
\*Figure does not include Clark<sup>11</sup>

Confidential

**Table 1: Demographics of Included Studies**

| Author           | Publication Year | Country   | Study Design                                            | Sample Size    | Health System Setting | Specialty /Setting    | Characteristics of SEM | Optional or Mandatory | Implementation Process                                                                                                                                                                                                                                                                                  | Implementation Fidelity                                                                                                                                                                   |
|------------------|------------------|-----------|---------------------------------------------------------|----------------|-----------------------|-----------------------|------------------------|-----------------------|---------------------------------------------------------------------------------------------------------------------------------------------------------------------------------------------------------------------------------------------------------------------------------------------------------|-------------------------------------------------------------------------------------------------------------------------------------------------------------------------------------------|
| MacLeod et al.   | 2009             | Canada    | Simple pre-post with non-equivalent groups, time-series | N/A            | Single-payer          | Surgery: Hip and knee | Central intake         | Optional              | The HKRP is a centralized intake model and referrals are registered and triaged by an advanced practice physiotherapist. Six hospitals within TC LHIN implemented HKRP. It is a single wait list and there is technology to support referral management.                                                | The TC LHIN is accountable for HKRP. They monitored wait lists under the Wait Times Strategy and worked collaboratively with hospitals to improve TC LHIN wait list management processes. |
| Clark            | 2015             | Canada    | Simple pre-post with non-equivalent groups, time-series | N/A            | Single-payer          | Chronic Pain          | Central intake         | Optional              | All referrals were triaged by a nurse and admin. Waitlists at 3 different sites were centralized, duplicates were identified and a single waitlist was formed.                                                                                                                                          | N/A                                                                                                                                                                                       |
| Goodsall et al.  | 2017             | Australia | Simple pre-post with non-equivalent groups, time-series | 1118 referrals | Two-tier              | Gastroenterology      | Single-point-of-entry  | Mandatory             | A pooled waiting list and centralized intake and triage with a "week on" roster for staff specialists was implemented. Intake and triage are categorized into "urgent" and "routine". Patients are seen by the next available provider and a rapid access clinic has been established for urgent cases. | N/A                                                                                                                                                                                       |
| Hazlewood et al. | 2016             | Canada    | Simple pre-post with non-equivalent                     | 8414 referrals | Single-payer          | Rheumatology          | Central intake         | Optional              | CREATe Rheum is a centralized referral system. Referrals are sent via a single fax number. A standardized referral form was given to RP (referring                                                                                                                                                      | The two senior rheumatologists were involved in providing training to other                                                                                                               |

1  
2  
3  
4  
5  
6  
7  
8  
9  
10  
11  
12  
13  
14  
15  
16  
17  
18  
19  
20  
21  
22  
23  
24  
25  
26  
27  
28  
29  
30  
31  
32  
33  
34  
35  
36  
37  
38  
39  
40  
41  
42  
43  
44  
45  
46  
47

|                  |      |        |                                                         |               |              |               |                       |           |                                                                                                                                                                                                                                                                                                                                                                                                                                                                                                                                                                                                                                                            |                                                          |
|------------------|------|--------|---------------------------------------------------------|---------------|--------------|---------------|-----------------------|-----------|------------------------------------------------------------------------------------------------------------------------------------------------------------------------------------------------------------------------------------------------------------------------------------------------------------------------------------------------------------------------------------------------------------------------------------------------------------------------------------------------------------------------------------------------------------------------------------------------------------------------------------------------------------|----------------------------------------------------------|
|                  |      |        | groups, time-series                                     |               |              |               |                       |           | physician) but the form was not enforced if all required information was given in the referral letter. A nurse with over 15 years of experience and 2 clerical support persons processed referrals to physicians. Any concerns with referrals were directed to two senior rheumatologists. They were also involved in providing training to other rheumatologist to ensure easy transition to the new system. A multiuser database was developed to track referrals and missing information was obtained by sending a standardized form to RP. Evaluation both after short-term implementation (2 years) and long-term impact (until 2013) were conducted. | rheumatologists to ensure easy transition to new system. |
| Wittmeier et al. | 2016 | Canada | Single pre-post with non-equivalent groups, time-series | 1399 patients | Single-payer | Physiotherapy | Central intake        | Mandatory | A central intake system was implemented by the Child Health Physiotherapy team at the Health Sciences Centre in Winnipeg for children requiring complex needs.                                                                                                                                                                                                                                                                                                                                                                                                                                                                                             | N/A                                                      |
| Bungard et al.   | 2009 | Canada | Simple pre-post with non-equivalent groups, time-series | 3096 patients | Single-payer | Cardiology    | Single-point-of-entry | Optional  | Cardiac EASE (Jan 2004-Dec 2006) is a single-point of entry model. Referrals were tracked through the MedTech database. All referrals were sent via fax to one EASE intake service location and reviewed by EASE NP. Patients and referring GP were offered the choice of enrolling in EASE. Cardiologist involvement was voluntary and most chose to participate. No                                                                                                                                                                                                                                                                                      | N/A                                                      |

|                 |      |         |                                                        |               |              |                   |                           |           |                                                                                                                                                                                                                                                                                                                                                                                                                                                                                                  |     |
|-----------------|------|---------|--------------------------------------------------------|---------------|--------------|-------------------|---------------------------|-----------|--------------------------------------------------------------------------------------------------------------------------------------------------------------------------------------------------------------------------------------------------------------------------------------------------------------------------------------------------------------------------------------------------------------------------------------------------------------------------------------------------|-----|
|                 |      |         |                                                        |               |              |                   |                           |           | advertising of the program. There was prompt feedback to the referring physician.                                                                                                                                                                                                                                                                                                                                                                                                                |     |
| Leach et al.    | 2004 | England | Simple pre-post with non-equivalent group, time-series | N/A           | Single-payer | Surgery: spinal   | Pooled list               | Optional  | A managed generic waiting list was implemented for initial outpatient appointment and subsequent surgery and a computerized MR booking system was integrated with outpatient follow-up appointments. As part of the managed generic waiting list, a consultant screened all new outpatient GP spinal referrals to assess suitability for a pooled waiting list and patients are referred to next available physician. The same process applies for the managed generic waiting list for surgery. | N/A |
| Bichel et al.   | 2009 | Canada  | Simple pre-post with no equivalent groups, time-series | 8289 patients | Single-payer | Internal Medicine | Central access and triage | Mandatory | The Conference Model preceded and allowed for the development and implementation of the Central Access and Triage (CAT) system. This involved pooling referrals by speciality, using standardized information requirements and policy for confirmation of receipt of referral, and acceptance and appointment. Wait times were measured in weeks until appointment based on triage priority.                                                                                                     | N/A |
| Schacter et al. | 2013 | Canada  | Prospective, pre-post with non-equivalent              | 920 patients  | Single-payer | Nephrology        | Central triage            | Optional  | A physician-led Provincial change strategy was implemented. Wait time issue was brought up in a preliminary survey at a BC nephrology                                                                                                                                                                                                                                                                                                                                                            | N/A |

1  
2  
3  
4  
5  
6  
7  
8  
9  
10  
11  
12  
13  
14  
15  
16  
17  
18  
19  
20  
21  
22  
23  
24  
25  
26  
27  
28  
29  
30  
31  
32  
33  
34  
35  
36  
37  
38  
39  
40  
41  
42  
43  
44  
45  
46  
47

|                       |      |        |                     |             |              |                        |                     |          |                                                                                                                                                                                                                                                                                                                                                                                                                                                                                                                                  |                                                                                                                                                                                                                |
|-----------------------|------|--------|---------------------|-------------|--------------|------------------------|---------------------|----------|----------------------------------------------------------------------------------------------------------------------------------------------------------------------------------------------------------------------------------------------------------------------------------------------------------------------------------------------------------------------------------------------------------------------------------------------------------------------------------------------------------------------------------|----------------------------------------------------------------------------------------------------------------------------------------------------------------------------------------------------------------|
|                       |      |        | groups, time-series |             |              |                        |                     |          | conference in 2009. In addition, through modified Delphi process, wait time targets were established through in-person meetings and surveys. Targets consider comorbidities, eGFR, BP and albuminuria. A priority score from 1-4 was assigned for referred conditions. Finally, the benchmark targets were approved by BC Nephrologists at the BCRA Medical Advisory Committee meeting and were then disseminated to all nephrologists in BC. A hard-copy reference sheet was provided to be used during triage of new patients. |                                                                                                                                                                                                                |
| Van den Heuvel et al. | 2012 | Canada | Cross-sectional     | 94 patients | Single-payer | Surgery: hernia clinic | Common waiting list | Optional | Patients were put on a common waiting list awaiting next available physician. Clinic was run by 4 surgeons, fellows, residents and students. All administrative data was inputted into one database. Triage by surgeon.                                                                                                                                                                                                                                                                                                          | Letter sent to GP informing them of the new initiative. Patients received letter with date and time of appointment along with information about the hernia clinic, health questionnaire and QoL questionnaire. |

**Table 2 Risk of Bias Assessment Utilizing ROBINS-I Tool**

| Article                     | Bias due to confounding | Bias in selection of participants into the study | Bias in classification of interventions | Bias due to deviations from intended interventions | Bias due to missing data | Bias in measurement of outcomes | Bias in selection of the reported result | Overall bias |
|-----------------------------|-------------------------|--------------------------------------------------|-----------------------------------------|----------------------------------------------------|--------------------------|---------------------------------|------------------------------------------|--------------|
| MacLeod et al (2019)        | Serious                 | Critical                                         | Low                                     | Low                                                | Moderate                 | Low                             | Low                                      | Critical     |
| Clark (2015)                | Serious                 | Low                                              | Low                                     | Moderate                                           | Moderate                 | Low                             | Low                                      | Serious      |
| Goodsall et al (2017)       | Serious                 | Moderate                                         | Low                                     | Moderate                                           | Moderate                 | Low                             | Low                                      | Serious      |
| Hazlewood et al (2016)      | Serious                 | Low                                              | Low                                     | Moderate                                           | Serious                  | Low                             | Low                                      | Serious      |
| Wittmeier et al (2016)      | Serious                 | Low                                              | Low                                     | Moderate                                           | Moderate                 | Low                             | Moderate                                 | Serious      |
| Bungard et al (2009)        | Serious                 | Low                                              | Low                                     | Moderate                                           | Low                      | Low                             | Low                                      | Serious      |
| Leach et al (2004)          | Serious                 | Moderate                                         | Low                                     | Low                                                | Low                      | Moderate                        | Low                                      | Serious      |
| Bichel et al (2009)         | Serious                 | Low                                              | Low                                     | Moderate                                           | Moderate                 | Low                             | Low                                      | Serious      |
| Schachter et al (2013)      | Serious                 | Moderate                                         | Low                                     | Moderate                                           | Moderate                 | Low                             | Low                                      | Serious      |
| van den Heuvel et al (2012) | Critical                | Low                                              | Low                                     | Moderate                                           | Moderate                 | Low                             | Moderate                                 | Critical     |

| Author<br>Page 27 of 29                                   | Pre WT1 (mean ±SD)                                                                                                  | Post WT1                                                                                                                                    | Absolute<br>Reduction (days)                                                                                                 | Percent<br>Reduction                                                                                                                | Patient Volume                                                                                                                                                                                | Control<br>Group Pre<br>WT1                                      | Control<br>Group Post<br>WT                                     |
|-----------------------------------------------------------|---------------------------------------------------------------------------------------------------------------------|---------------------------------------------------------------------------------------------------------------------------------------------|------------------------------------------------------------------------------------------------------------------------------|-------------------------------------------------------------------------------------------------------------------------------------|-----------------------------------------------------------------------------------------------------------------------------------------------------------------------------------------------|------------------------------------------------------------------|-----------------------------------------------------------------|
| 1 MacLeod<br>1 et al.                                     | Knee: 203 days; hip:<br>162 days                                                                                    | knee: 115 days ; hip:98 days                                                                                                                | knee: 88; hip:64<br>(days)                                                                                                   | knee: 43.3;<br>hip: 39.5                                                                                                            | N/A                                                                                                                                                                                           | N/A                                                              | N/A                                                             |
| 2 Clark<br>3                                              | Around 24 to more than<br>48 months                                                                                 | 9 month overall reduction                                                                                                                   | 274                                                                                                                          | N/A                                                                                                                                 | N/A                                                                                                                                                                                           | N/A                                                              | N/A                                                             |
| 4 Goodsall<br>5 et al.                                    | 78 days                                                                                                             | 58 days (p<0.01)                                                                                                                            | 20 (days)                                                                                                                    | 25.6                                                                                                                                | N/A                                                                                                                                                                                           | N/A                                                              | N/A                                                             |
| 6 Hazlewood<br>7 et al.<br>8<br>9<br>10                   | Routine referrals:<br>155 ± 88 days; moderate<br>referrals: 110 ± 57 days;<br>urgent referrals: 29 ± 46<br>days     | Routine referrals: 149 ± 65 days (p<br>=0.11); moderate referrals:78 ± 56<br>days (p < 0.001); urgent referrals: 18<br>± 23 days; (p= 0.01) | routine: 6;<br>moderate: 32;<br>urgent:11                                                                                    | routine:3.87;<br>moderate:29.1;<br>urgent:37.9                                                                                      | N/A                                                                                                                                                                                           | N/A                                                              | N/A                                                             |
| 1 Wittmeier<br>2 et al.<br>13<br>14<br>15                 | Children with complex<br>needs<br>(neurodevelopmental<br>conditions): 29.8 ± 17.9<br>days                           | Children with complex needs: 24.3 ±<br>17.0 (p<0.0001) days                                                                                 | 5.5                                                                                                                          | 18.5                                                                                                                                | Complex needs: referral volume<br>same. Comparison: increasing<br>referral volume                                                                                                             | Comparison<br>group<br>(orthopedic<br>conditions):<br>20.4(14.3) | Comparison<br>group:<br>comparison:<br>22.1(13.1)<br>(p<0.0001) |
| 16 Bungard et<br>17 al.                                   | 71±45 days                                                                                                          | 33±19 days (p<0.0001)                                                                                                                       | 38                                                                                                                           | 53.5                                                                                                                                | Increase by ~50% from 2004 to<br>2005 and 19% from 2005 to 2006                                                                                                                               | N/A                                                              | N/A                                                             |
| 18 Leach et<br>19 al.<br>20<br>21<br>22<br>23<br>24<br>25 | Number of patients<br>waiting more than 26<br>weeks: 85; number of<br>patients waiting more<br>than 13-26 weeks: 95 | Number of patients waiting more<br>than 26 weeks: 0; number of patients<br>waiting more than 13-26 weeks: 10                                | Number of<br>patients waiting<br>more than 26<br>weeks: 65;<br>number of<br>patients waiting<br>more than 13-26<br>weeks: 76 | Number of<br>patients<br>waiting more<br>than 26 weeks:<br>72.2; number<br>of patients<br>waiting more<br>than 13-26<br>weeks: 86.3 | N/A                                                                                                                                                                                           | N/A                                                              | N/A                                                             |
| 26 Bichel et<br>27 al.<br>28<br>29<br>30<br>31            | Urgent referral mean: 29<br>(± 46) days, moderate-<br>level: 110 (± 57) days,<br>routine-level: 155 (± 88)<br>days  | Urgent referral: 17 (± 14) days (p <<br>.05), moderate-level: 63 (± 42) days<br>(p < .00005), routine-level: 108 (±<br>37) days (p=N/A)     | urgent referral<br>mean: 12;<br>moderate-level:<br>47; routine-level:<br>47                                                  | Urgent referral<br>mean: 41.4;<br>moderate-<br>level: 42.7;<br>routine-level:<br>30.3                                               | Increase in referral volume:<br>Endocrine 75%, Gastroenterology<br>50%, General Internal Medicine<br>26% . No change in referral<br>volume: Rheumatology and<br>Hematology in referral volume | N/A                                                              | N/A                                                             |
| 32 Schacter et<br>33 al.                                  | 98(IQR44,157) days                                                                                                  | 64(IQR21,120) days (p = <.001).<br>Improved the most for high priority                                                                      | 34                                                                                                                           | 34.7                                                                                                                                | N/A                                                                                                                                                                                           | N/A                                                              | N/A                                                             |

34 **Table 3: Outcomes of Included Studies**

35

36

37

38

39

40

41

42

43

44

45

46

47

1  
2

|                                |                     |                   |     |      |     |     |     |
|--------------------------------|---------------------|-------------------|-----|------|-----|-----|-----|
|                                |                     | patients          |     |      |     |     |     |
| 4Van den<br>5Heuvel et<br>6al. | 208 days ± 139 days | 59 days ± 70 days | 149 | 71.6 | N/A | N/A | N/A |

7

8

9

10

11

### Appendix 1: Patient and Provider Satisfaction Across Included Studies

12

13

14

15

16

17

18

19

20

21

22

23

24

25

26

27

28

29

30

31

32

33

34

35

36

37

38

39

40

41

42

43

44

45

46

47

| Author                | Pre-Implementation Patient Satisfaction | Post-Implementation Patient Satisfaction                                                                                                                                                                                                                                                                                                       | Pre-Implementation Provider Satisfaction                                                                                                                                                    | Post-Implementation Provider Satisfaction                                                                                                                                       |
|-----------------------|-----------------------------------------|------------------------------------------------------------------------------------------------------------------------------------------------------------------------------------------------------------------------------------------------------------------------------------------------------------------------------------------------|---------------------------------------------------------------------------------------------------------------------------------------------------------------------------------------------|---------------------------------------------------------------------------------------------------------------------------------------------------------------------------------|
| MacLeod et al.        | N/A                                     | Improves patient satisfaction                                                                                                                                                                                                                                                                                                                  | N/A                                                                                                                                                                                         | N/A                                                                                                                                                                             |
| Clark                 | N/A                                     | N/A                                                                                                                                                                                                                                                                                                                                            | N/A                                                                                                                                                                                         | N/A                                                                                                                                                                             |
| Goodsall et al.       | N/A                                     | N/A                                                                                                                                                                                                                                                                                                                                            | N/A                                                                                                                                                                                         | N/A                                                                                                                                                                             |
| Hazlewood et al.      | N/A                                     | N/A                                                                                                                                                                                                                                                                                                                                            | Rheumatologists: 1/3 rated referrals poor quality, 1/3 rated referrals moderate. 75% of rheumatologists were not satisfied with completeness of information provided by referring physician | Rheumatologists: 72% rated referral quality as moderate, 9% rated referral quality as high. Completeness of information: moderate in 68% of referrals, high in 19% of referrals |
| Wittmeier et al.      | 96.6% satisfaction                      | 98% satisfaction                                                                                                                                                                                                                                                                                                                               | N/A                                                                                                                                                                                         | N/A                                                                                                                                                                             |
| Bungard et al.        | N/A                                     | N/A                                                                                                                                                                                                                                                                                                                                            | N/A                                                                                                                                                                                         | N/A                                                                                                                                                                             |
| Leach et al.          | N/A                                     | N/A                                                                                                                                                                                                                                                                                                                                            | N/A                                                                                                                                                                                         | N/A                                                                                                                                                                             |
| Bichel et al.         | N/A                                     | N/A                                                                                                                                                                                                                                                                                                                                            | N/A                                                                                                                                                                                         | N/A                                                                                                                                                                             |
| Schacter et al.       | N/A                                     | N/A                                                                                                                                                                                                                                                                                                                                            | N/A                                                                                                                                                                                         | N/A                                                                                                                                                                             |
| Van den Heuvel et al. | N/A                                     | 78.3% (two-thirds) of patients felt that service was faster in specialized centre, 88.6% of patients felt that service was better in specialized centre. Importance of same surgeon in group 1 (same surgeon for assessment and surgery):98.4%, in group 2 group (different surgeon for assessment and surgery):48.3%. Confidence in operating | N/A                                                                                                                                                                                         | N/A                                                                                                                                                                             |



1  
2  
3  
4  
5  
6  
7  
8  
9  
10  
11  
12  
13  
14  
15  
16  
17  
18  
19  
20  
21  
22  
23  
24  
25  
26  
27  
28  
29  
30  
31  
32  
33  
34  
35  
36  
37  
38  
39  
40  
41  
42  
43  
44  
45  
46  
47

|  |  |                                         |  |  |
|--|--|-----------------------------------------|--|--|
|  |  | surgeon (group 1: 100%; group 2: 86.2%) |  |  |
|--|--|-----------------------------------------|--|--|

Confidential

## Appendix A MEDLINE Search Strategy

1 Waiting Lists/

2 Health Care Rationing/

3 “Appointments and Schedules”/

4 Systems Theory/

5 exp TRIAGE/

6 wait\* list\*.tw.

7 queu\*.tw.

8 single-entry.tw.

9 central\* intake.tw.

10 common intake.tw.

11 single point-of-entr\*.tw.

12 pooled.tw.

13 pooling.tw.

14 (generic adj3 list\*).tw.

15 (common adj3 list\*).tw.

16 (one adj3 point adj access).tw.

17 triag\*.tw.

18 1 or 3 or 6

19 2 or 4 or 5 or 7 or 8 or 9 or 10 or 11 or 12 or 13 or 14 or 15 or 16 or 17

20 18 and 19
